# Supplementary material for: A facile method for synthesizing CuS decorated Ti3C2 MXene with enhanced performance for asymmetric supercapacitors
Source: Royal Society of Chemistry journal article supplement (doi:10.1039/c9ta00085b), 2019-01-01
Supplement: c9ta00085b1.pdf [file c9ta00085b1.pdf]

## Supporting Information

### Facile CuS Decorated $\text{Ti}_3\text{C}_2$ MXene with Enhanced Performance for Asymmetric Supercapacitor

Zhihu Pan,<sup>a</sup> Fa Cao,<sup>a</sup> Xing Hu,<sup>a</sup> Xiaohong Ji<sup>a,b\*</sup>

<sup>a</sup> School of Materials Science and Engineering, South China University of Technology,  
Guangzhou 510641, China.

<sup>b</sup> State Key Laboratory of Luminescent Materials and Devices, South China University of  
Technology, Guangzhou 510641, China.

\*E-mail: [jxhong@scut.edu.cn](mailto:jxhong@scut.edu.cn)

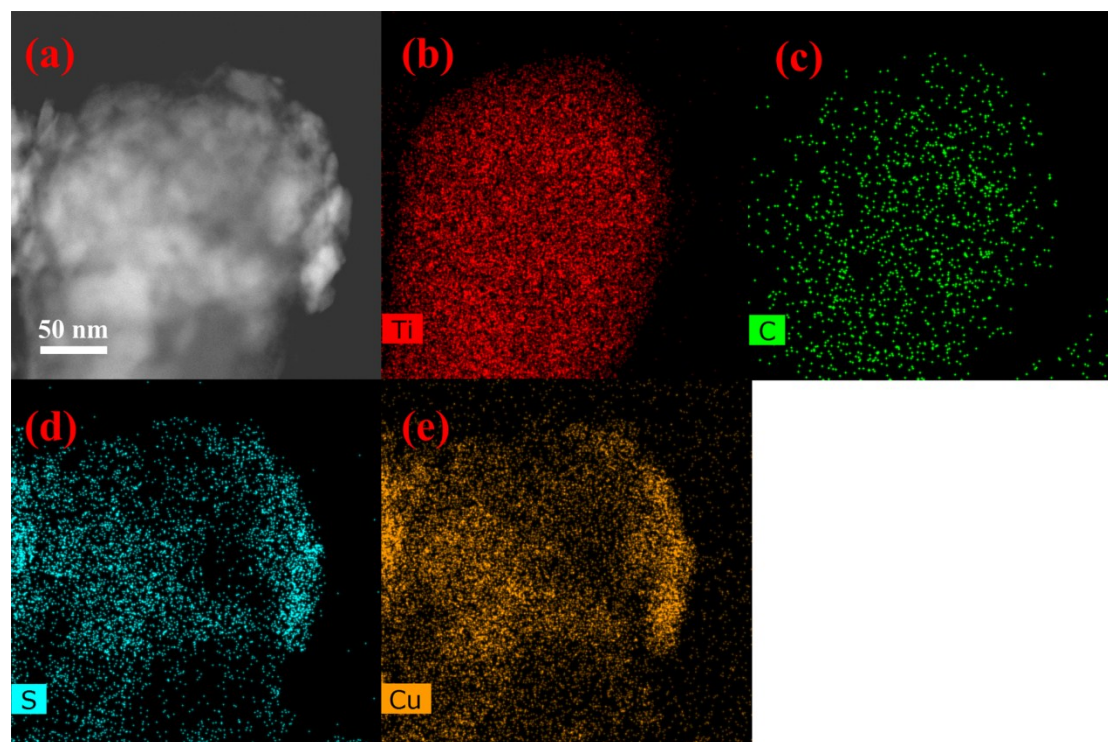

**Figure S1.** (a) TEM image of TC-9 and elemental mapping images of (b) Ti, (c) C, (d) S and (e) Cu.

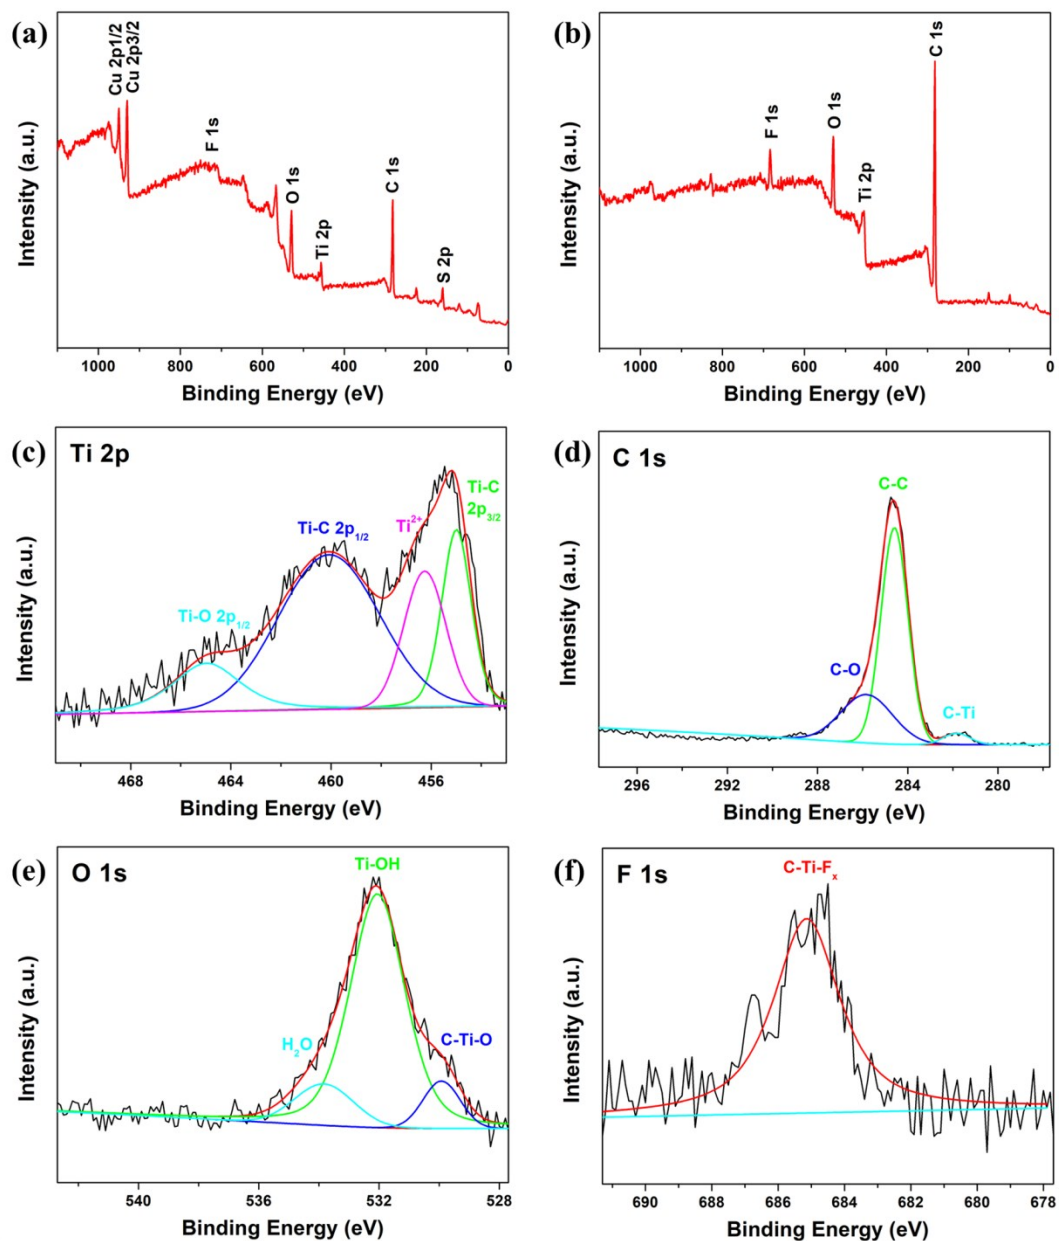

**Figure S2.** XPS survey spectra (a) TC-9 and (b)  $\text{Ti}_3\text{C}_2$ . High resolution XPS spectra of  $\text{Ti}_3\text{C}_2$ : (c) Ti 2p, (d) C 1s, (e) O 1s, and (f) F 1s.

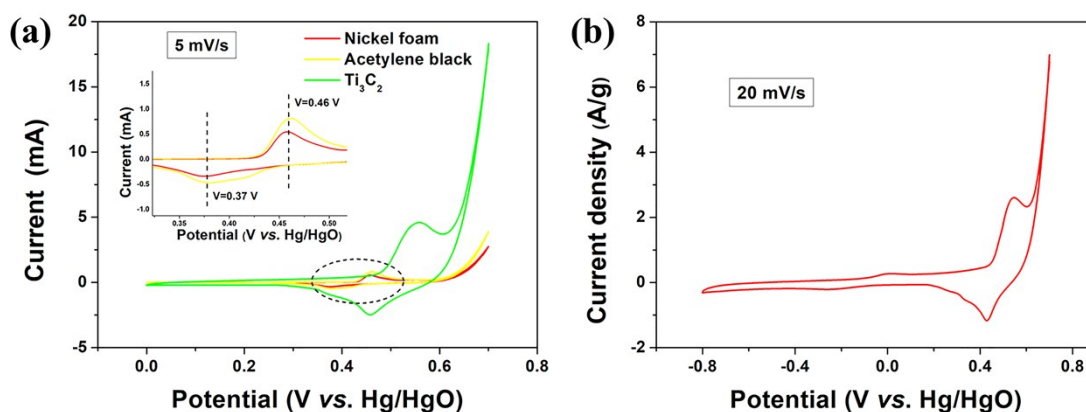

**Figure S3.** (a) CV curves of nickel foam, acetylene black and  $\text{Ti}_3\text{C}_2$  electrodes at a scan rate of 5 mV/s, the inset is the CV curves of nickel foam and acetylene black. (b) CV curve of  $\text{Ti}_3\text{C}_2$  in the potential range -0.8 - 0.7 V (the scan rate was 20 mV/s).

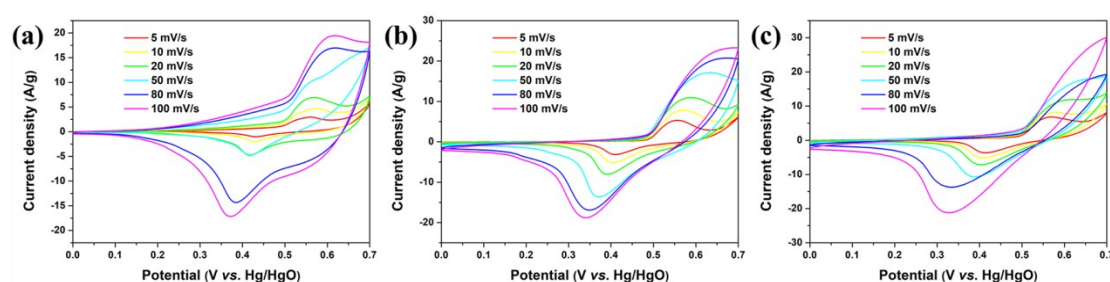

**Figure S4.** CV curves of the (a) CuS, (b) TC-6 and (c) TC-12 electrodes at various scan rates of 5, 10, 20, 50, 80 and 100 mV/s.

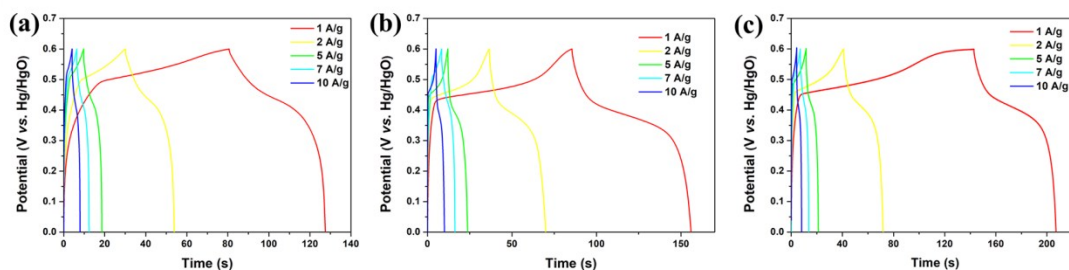

**Figure S5.** GCD curves of the (a) CuS and (b) TC-6 and (c) TC-12 electrodes at various current densities of 1, 2, 5, 7 and 10 A/g.

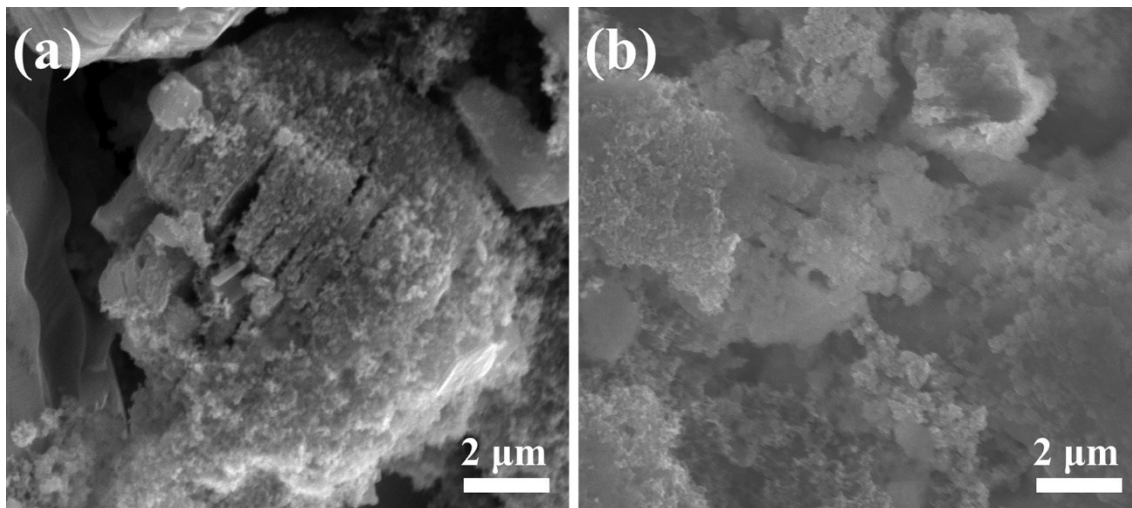

**Figure S6.** The SEM image of TC-9 electrode (a) before and (b) after a 5000-cycle test at 5

A/g.

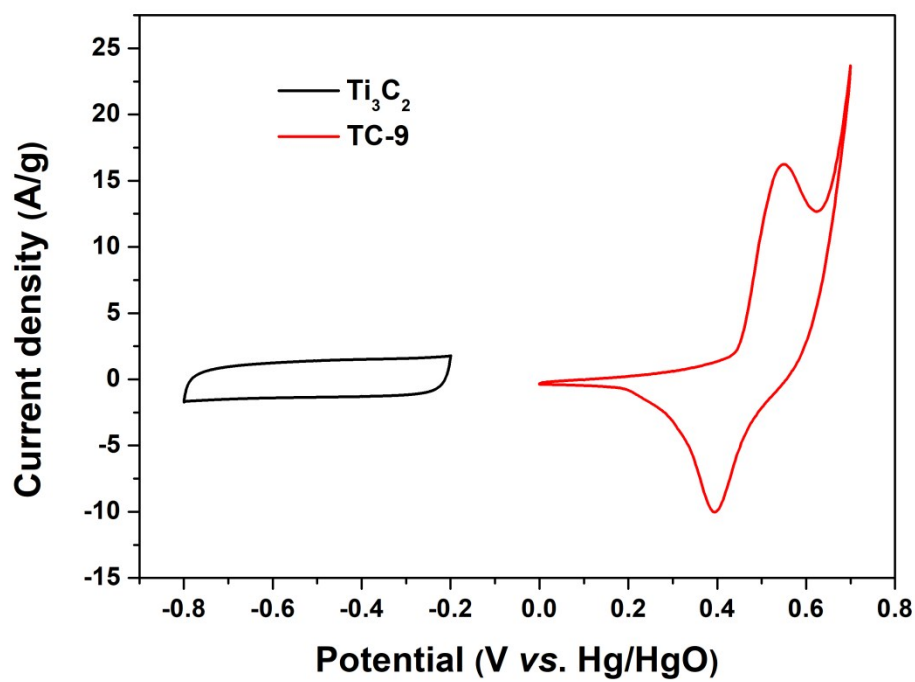

**Figure S7.** CV curves of  $\text{Ti}_3\text{C}_2$  and TC-9 electrodes in different potential range at scan rate of 20 mV/s.

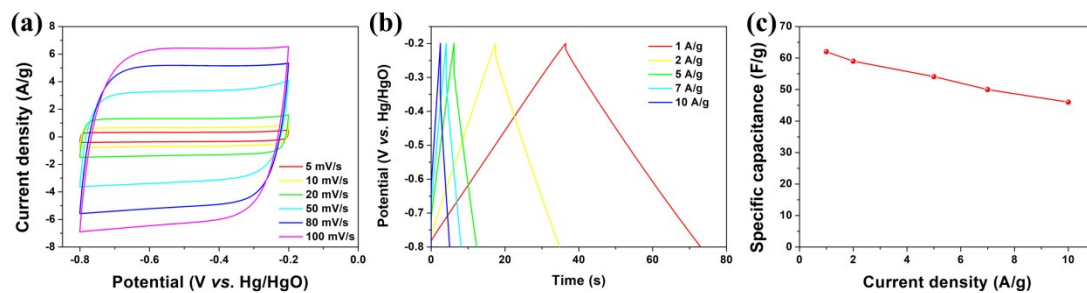

**Figure S8.** (a) CV curve of  $\text{Ti}_3\text{C}_2$  in the potential range of -0.8 to -0.2 V; (b) GCD curves of the  $\text{Ti}_3\text{C}_2$  in the potential range of -0.8 to -0.2 V. (c) Specific capacities of the  $\text{Ti}_3\text{C}_2$  electrodes at various current densities.

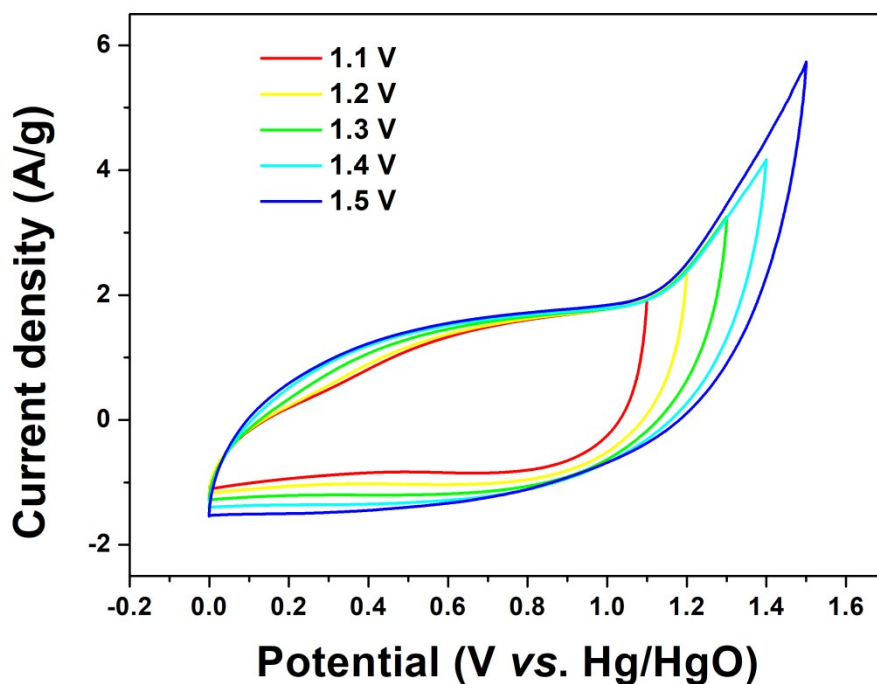

**Figure S9.** CV curves of the asymmetric supercapacitor at the potential range from 1.1V to 1.5V (the scan rate was 20 mV/s).

**Table S1**

Comparison of electrochemical performance of different electrodes for supercapacitors.

| Materials                                        | Electrolyte                        | Specific capacitance                                                  | Cycling stability | Ref.      |
|--------------------------------------------------|------------------------------------|-----------------------------------------------------------------------|-------------------|-----------|
| CuS                                              | 2 M KOH                            | 204 F g <sup>-1</sup> at 2 A g <sup>-1</sup>                          | 74%/3000 cycles   | [1]       |
| CuS                                              | 1 M KOH                            | 378 mF cm <sup>-2</sup> at 2 mA cm <sup>-2</sup>                      | 91%/2000 cycles   | [2]       |
| CNT/CuS                                          | 2 M KOH                            | 122 F g <sup>-1</sup> at 1.2 A g <sup>-1</sup>                        | 96%/1000 cycles   | [3]       |
| d-Ti <sub>3</sub> C <sub>2</sub>                 | 1 M KOH                            | 134 F g <sup>-1</sup> at 20 mV s <sup>-1</sup>                        | 94%/5000 cycles   | [4]       |
| N-doped Ti <sub>3</sub> C <sub>2</sub>           | 1 M H <sub>2</sub> SO <sub>4</sub> | 192 F g <sup>-1</sup> at 2 mV s <sup>-1</sup>                         | 92%/10000 cycles  | [5]       |
| TiO <sub>2</sub> /Ti <sub>3</sub> C <sub>2</sub> | 6 M KOH                            | 143 F g <sup>-1</sup> at 5 mV s <sup>-1</sup>                         | 92%/6000 cycles   | [6]       |
| RGO/Ti <sub>3</sub> C <sub>2</sub>               | 2 M KOH                            | 154.3 F g <sup>-1</sup> at 2 mV s <sup>-1</sup>                       | 85%/6000 cycles   | [7]       |
| MnO <sub>2</sub> /Ti <sub>3</sub> C <sub>2</sub> | 1 M KOH                            | 212 F g <sup>-1</sup> at 1 A g <sup>-1</sup>                          | 88%/10000 cycles  | [8]       |
| CuS/Ti <sub>3</sub> C <sub>2</sub>               | 1 M KOH                            | 282 F g <sup>-1</sup> (169 C g <sup>-1</sup> ) at 1 A g <sup>-1</sup> | 90.5%/5000 cycles | This work |

d-: delaminated; N-: nitrogen-doped.

**References**

1. J. Zhang, H. Feng, J. Yang, Q. Qin, H. Fan, C. Wei and W. Zheng, *ACS Applied Materials & Interfaces*, 2015, **7**, 21735-21744.
2. Y.-W. Lee, B.-S. Kim, J. Hong, J. Lee, S. Pak, H.-S. Jang, D. Whang, S. Cha, J. I. Sohn and J. M. Kim, *Journal of Materials Chemistry A*, 2016, **4**, 10084-10090.
3. T. Zhu, B. Xia, L. Zhou and X. Wen Lou, *Journal of Materials Chemistry*, 2012, **22**, 7851.
4. M. R. Lukatskaya, O. Mashtalir, C. E. Ren, Y. Dall'Agnese, P. Rozier, P. L. Taberna, M. Naguib, P. Simon, M. W. Barsoum and Y. Gogotsi, *Science*, 2013, **341**, 1502-1505.
5. Y. Wen, T. E. Rufford, X. Chen, N. Li, M. Lyu, L. Dai and L. Wang, *Nano Energy*, 2017, **38**, 368-376.
6. J. F. Zhu, Y. Tang, C. H. Yang, F. Wang and M. J. Cao, *Journal of the Electrochemical Society*, 2016, **163**, A785-A791.
7. C. Zhao, Q. Wang, H. Zhang, S. Passerini and X. Qian, *ACS Applied Materials & Interfaces*, 2016, **8**, 15661-15667.
8. R. B. Rakhi, B. Ahmed, D. Anjum and H. N. Alshareef, *ACS Applied Materials & Interfaces*, 2016, **8**, 18806-18814.
